# Supplementary material for: Diffusion of ferrocene through vanadyl phosphate by density functional theory
Source: Royal Society of Chemistry journal article supplement (doi:10.1039/d4cp02433h), 2024-01-01
Supplement: d4cp02433h38.pdf [file d4cp02433h38.pdf]

Diffusion of Ferrocene through Vanadyl Phosphate by Density Functional  
Theory (Supporting Information)

Yuan Liu (刘源)<sup>1</sup>, An T. Ta<sup>1</sup>, R. Seaton Ullberg<sup>1</sup>, Jiahui Liu<sup>2</sup>, Daniel R. Talham<sup>2</sup>  
and Simon R. Phillpot<sup>1\*</sup>

<sup>1</sup>Department of Materials Science and Engineering, University of Florida,  
Gainesville FL 32611 USA

<sup>2</sup>Department of Chemistry, University of Florida, Gainesville FL 32611 USA

To be submitted to Physical Chemistry Chemical Physics

**Table of Contents**

|                                                                      |    |
|----------------------------------------------------------------------|----|
| <i>Effect of Spring Constant on NEB Barriers</i> .....               | 2  |
| <i>Intercalation Configurations</i> .....                            | 3  |
| <i>Density of States</i> .....                                       | 5  |
| <i>Sliding Only: V → V[110]</i> .....                                | 7  |
| <i>Rolling Direction Effect: Clockwise vs. Anti-clockwise)</i> ..... | 8  |
| <i>Sliding + Rolling: V → V[110]</i> .....                           | 9  |
| <i>Denser Images of Dihedral Angle for E-V-45° to E-V-45°</i> .....  | 11 |
| <i>Sliding + Rotation + Rolling: V → V[110]</i> .....                | 12 |
| <i>Sliding Only: P → P [110]</i> .....                               | 13 |
| <i>Sliding + Rolling: P → P[110]</i> .....                           | 14 |
| <i>Sliding + Rotation + Rolling: P → P[110]</i> .....                | 15 |
| <i>Sliding Only: V → P[100]</i> .....                                | 16 |
| <i>Sliding + Rotation: V → P[100]</i> .....                          | 17 |
| <i>Sliding + Rolling: V → P[100]</i> .....                           | 18 |
| <i>Sliding + Rolling + Rotation: V → P[110]</i> .....                | 19 |

## Effect of Spring Constant on NEB Barriers

We tested four different spring constants,  $-0.5 \text{ eV/\AA}^2$ ,  $-3 \text{ eV/\AA}^2$ ,  $-5 \text{ eV/\AA}^2$  and  $-7 \text{ eV/\AA}^2$ .  
The NEB energy barriers are independent of the spring constant. See Figure S1 below.

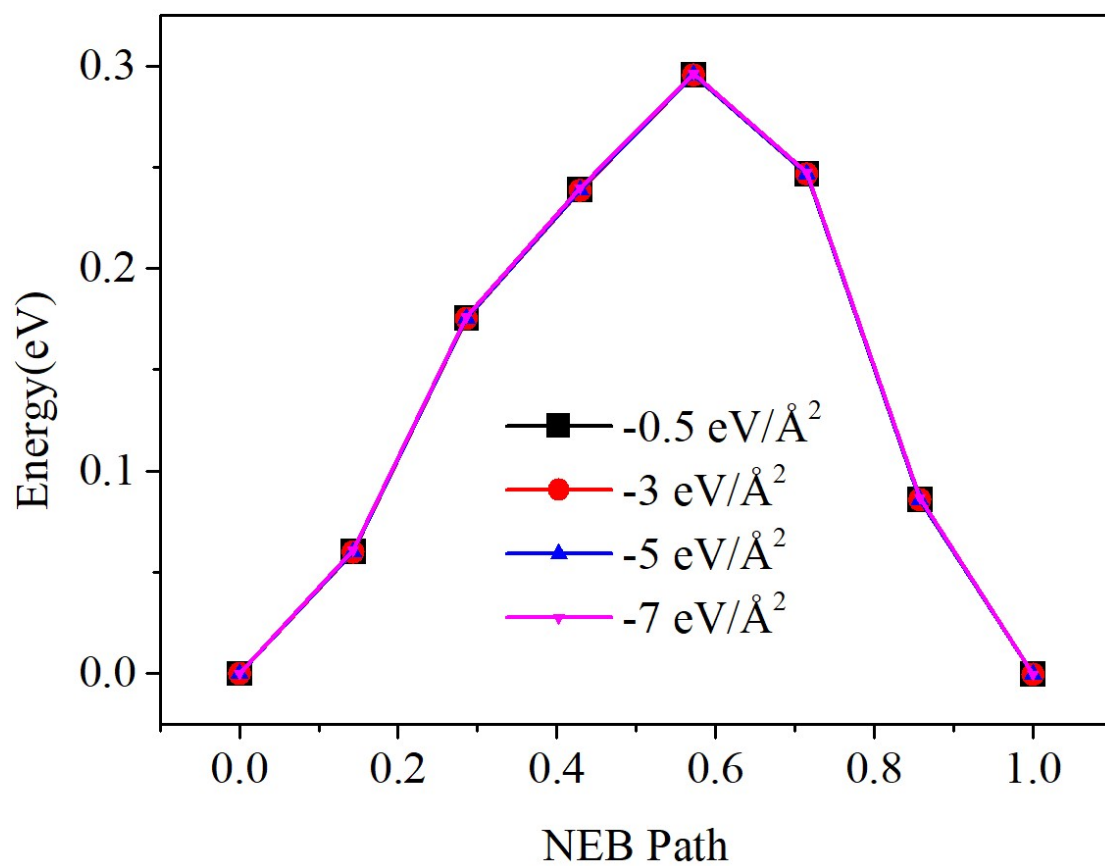

**Figure S1.** Evaluation of the effect of spring constant on NEB calculations for E-V-45° to E-V-45° path.

## Intercalation Configurations

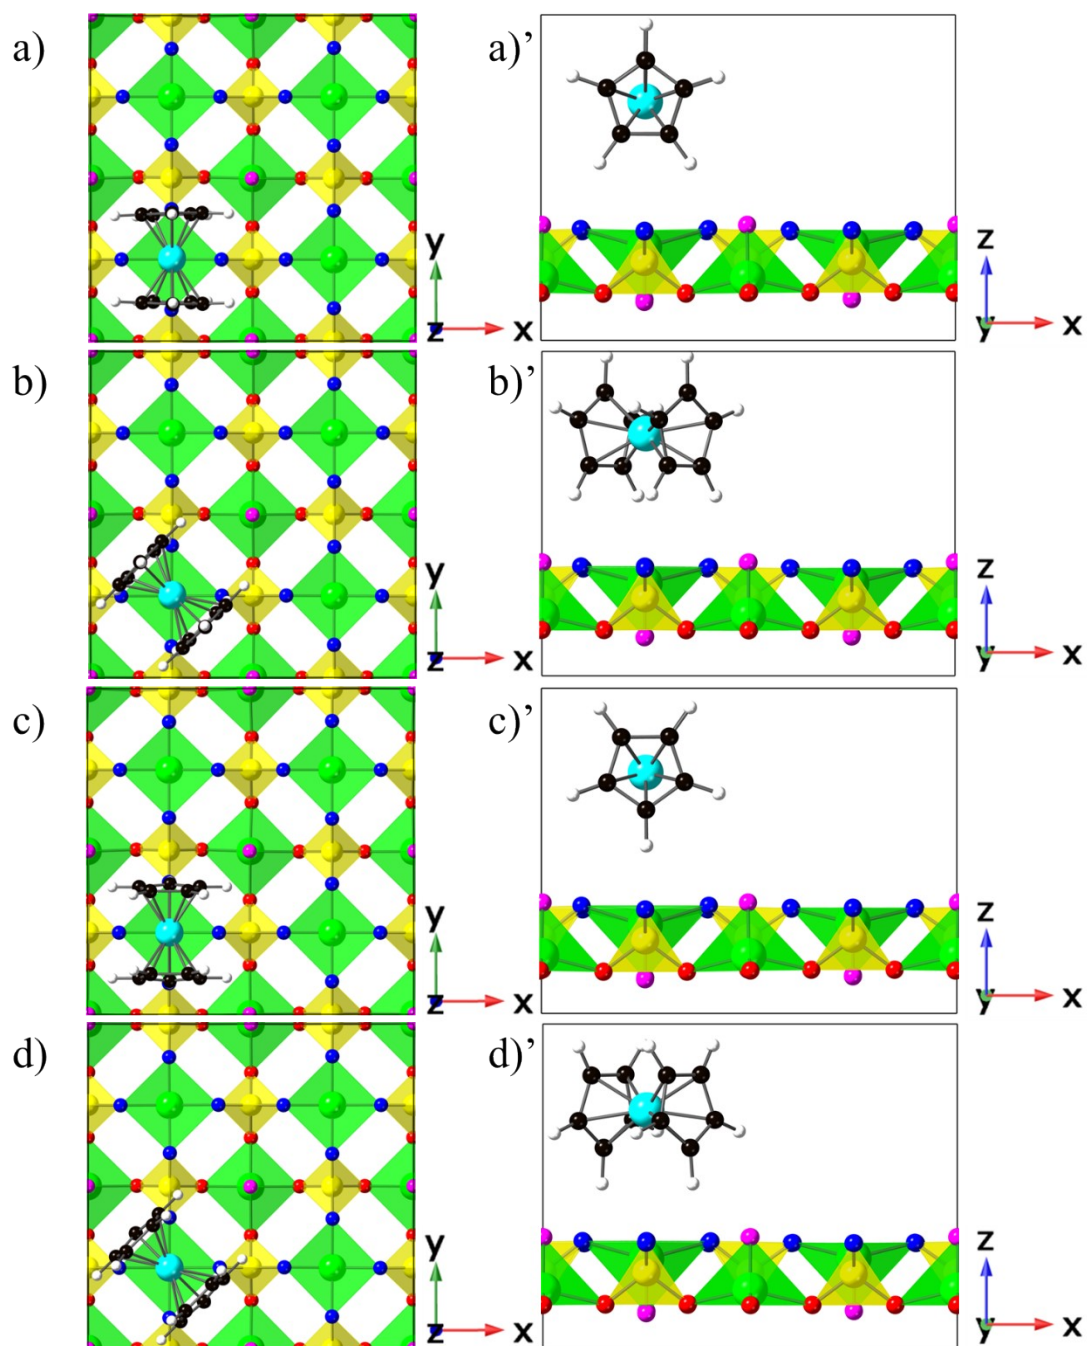

**Figure S2.** The configurations of a) E-VO-0°, b) E-VO-45°, c) E-V-0° and d) E-V-45° are viewed along the [001] direction. The corresponding pictures denoted with prime (') are viewed along the [010] direction. All subsequent configurations are shown in the same directions as these ones. The black box is the unit cell.

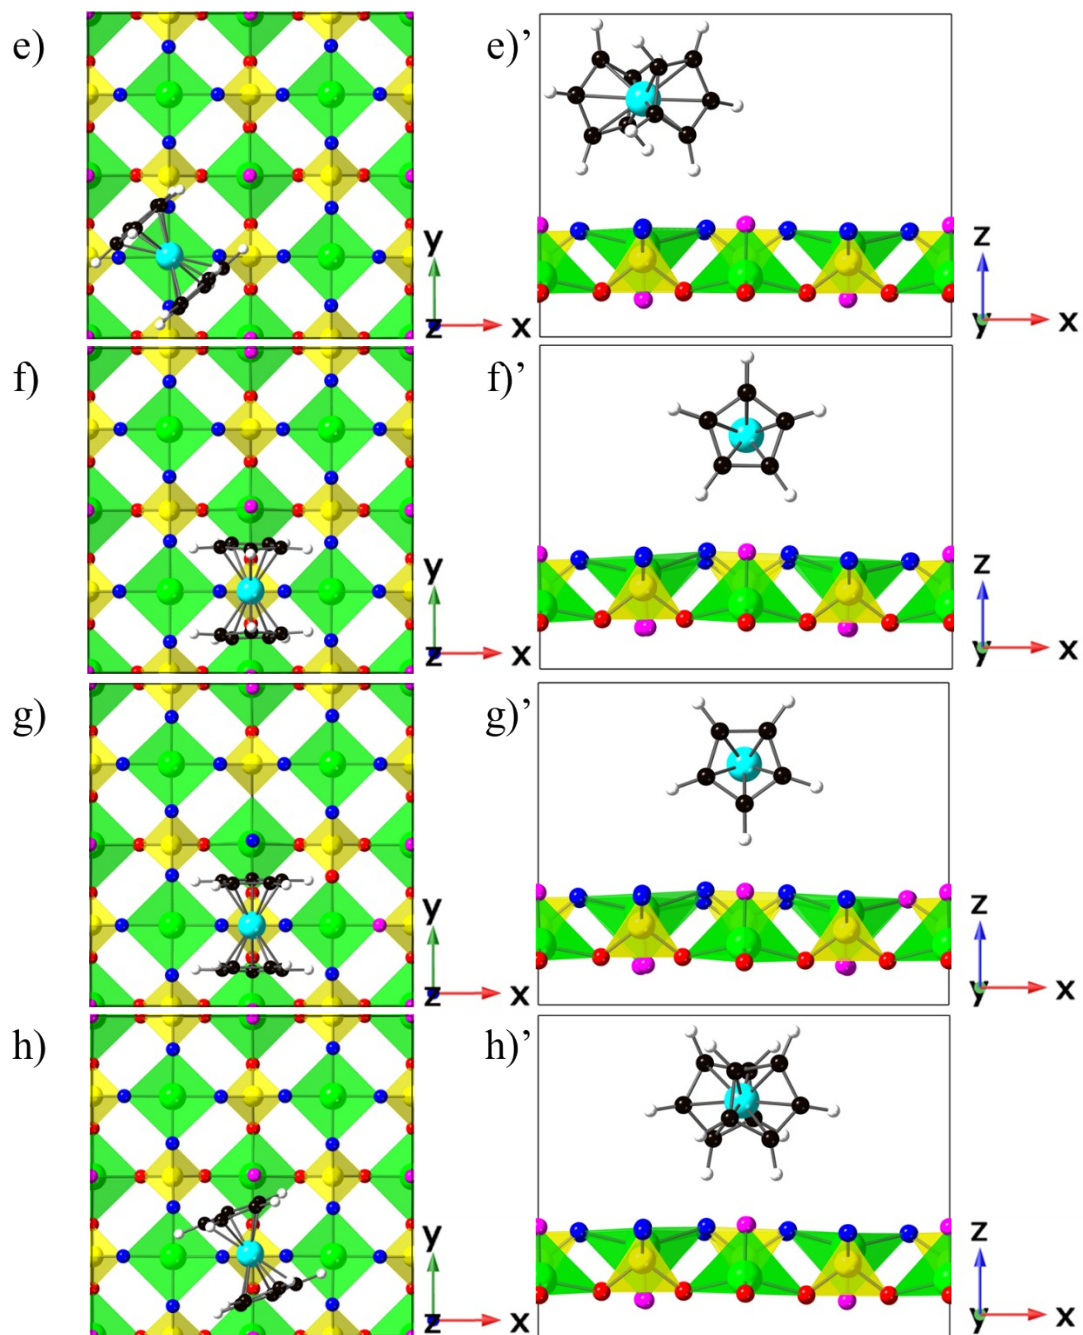

**Figure S2.** The configurations of e) S-V-45°, f) E-P<sub>V0</sub>-0°, g) E-P<sub>V</sub>-0° and h) G-P-20° are viewed along the  $[001]$  direction. The corresponding pictures denoted with prime (') are viewed along the  $[010]$  direction. The black box is the unit cell.

# Density of States

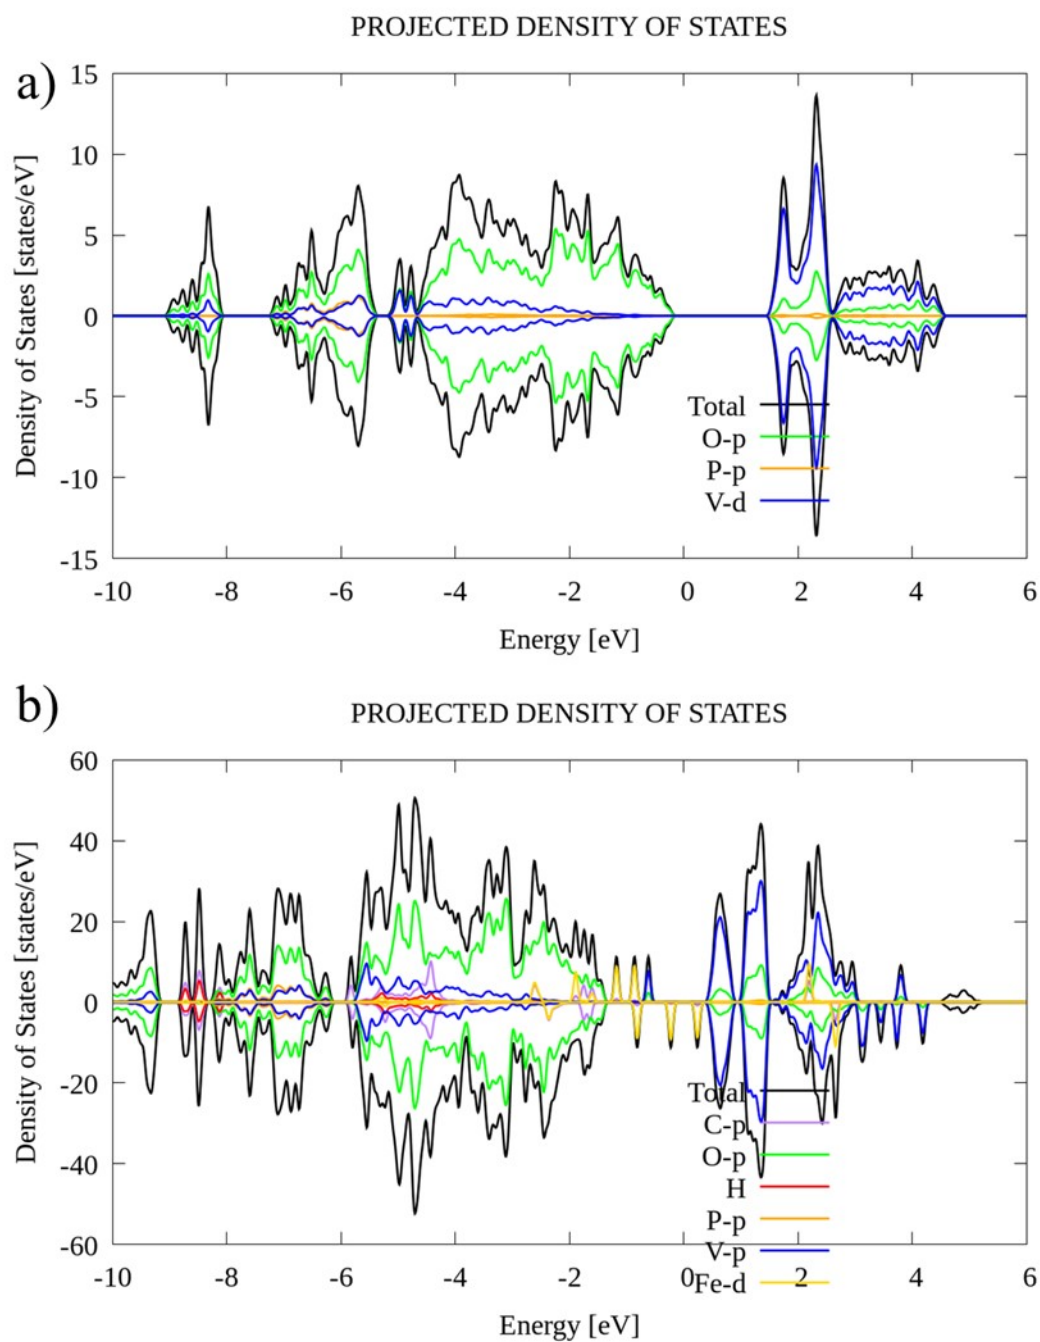

**Figure S3.** a) Pristine VOPO<sub>4</sub> DOS, and b) Intercalated Ferrocene-VOPO<sub>4</sub> DOS.

The density of states (DOS) for both the pristine VOPO<sub>4</sub> and the intercalated ferrocene-VOPO<sub>4</sub> phases (E-V-45°). The DOS plots are shown in Figures S3.

### **1. Band Gap Reduction:**

- o Pristine VOPO<sub>4</sub>: The pristine VOPO<sub>4</sub> exhibits a clear band gap of approximately 2 eV, characteristic of a semiconductor.
- o Intercalated Ferrocene-VOPO<sub>4</sub>: Upon intercalation with ferrocene, the band gap significantly reduces to about 0.5 eV. This substantial reduction in band gap indicates that the material transitions towards a more conductive state. The narrowing of the band gap is primarily due to the introduction of new electronic states by the ferrocene molecules.

### **2. Elemental Contributions:**

- o Pristine VOPO<sub>4</sub>: The DOS shows that the O-p orbitals (green) contribute significantly in the energy range from -8 eV to -2 eV, while the V-d orbitals (blue) dominate near the conduction band (2 eV to 4 eV). The P-p orbitals (orange) also contribute within the valence band but to a lesser extent.
- o Intercalated Ferrocene-VOPO<sub>4</sub>: The introduction of ferrocene leads to new states primarily from the Fe-d orbitals (yellow) near the Fermi level. This inclusion results in increased electronic states around the Fermi level, contributing to the observed decrease in the band gap. The O-p and P-p orbitals continue to show significant contributions in the valence band, while the V-d orbitals remain significant in the conduction band.

### **3. Electronic Structure and Conductivity:**

- o The drastic reduction in the band gap upon ferrocene intercalation suggests a transition from semiconducting to a more metallic or highly conductive behavior. This is supported by the increased density of states at the Fermi level, indicating that electrons can more easily be excited to the conduction band, enhancing the material's conductivity.
- o The presence of Fe-d states at the Fermi level introduces additional pathways for electron conduction, which could be beneficial for applications requiring high electrical conductivity.

The calculated DOS for pristine and intercalated VOPO<sub>4</sub> phases reveals significant changes in electronic structure upon ferrocene intercalation. The band gap reduction and the increased density of states at the Fermi level imply enhanced electronic conductivity, which could be advantageous for various electronic and electrochemical applications.

## Sliding Only: $V \rightarrow V[110]$ .

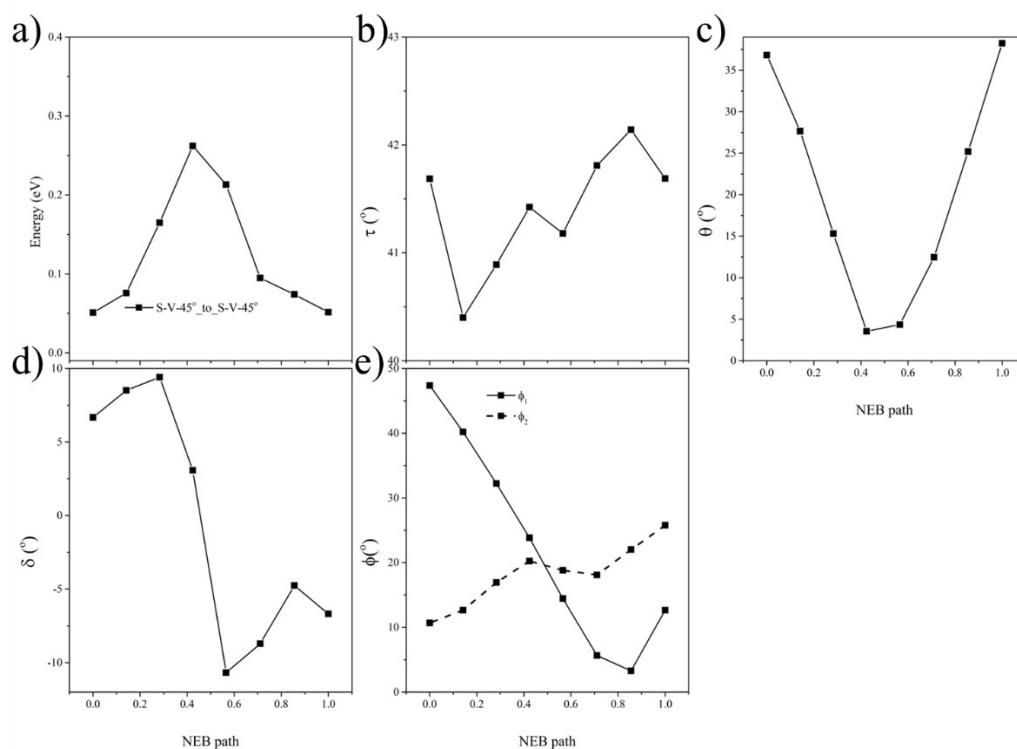

**Figure S4.** a) NEB energy profiles for pathways S-V-45° to S-V-45°; b) rotational angle variations of ferrocene; c) changes in the angle between -CH bonds in the cyclopentadienyl rings; d) dihedral angle adjustments between the cyclopentadienyl rings; e) orientation of -CH bonds relative to the [001] direction for the S-V-45° to S-V-45° path.

## Rolling Direction Effect: Clockwise vs. Anti-clockwise)

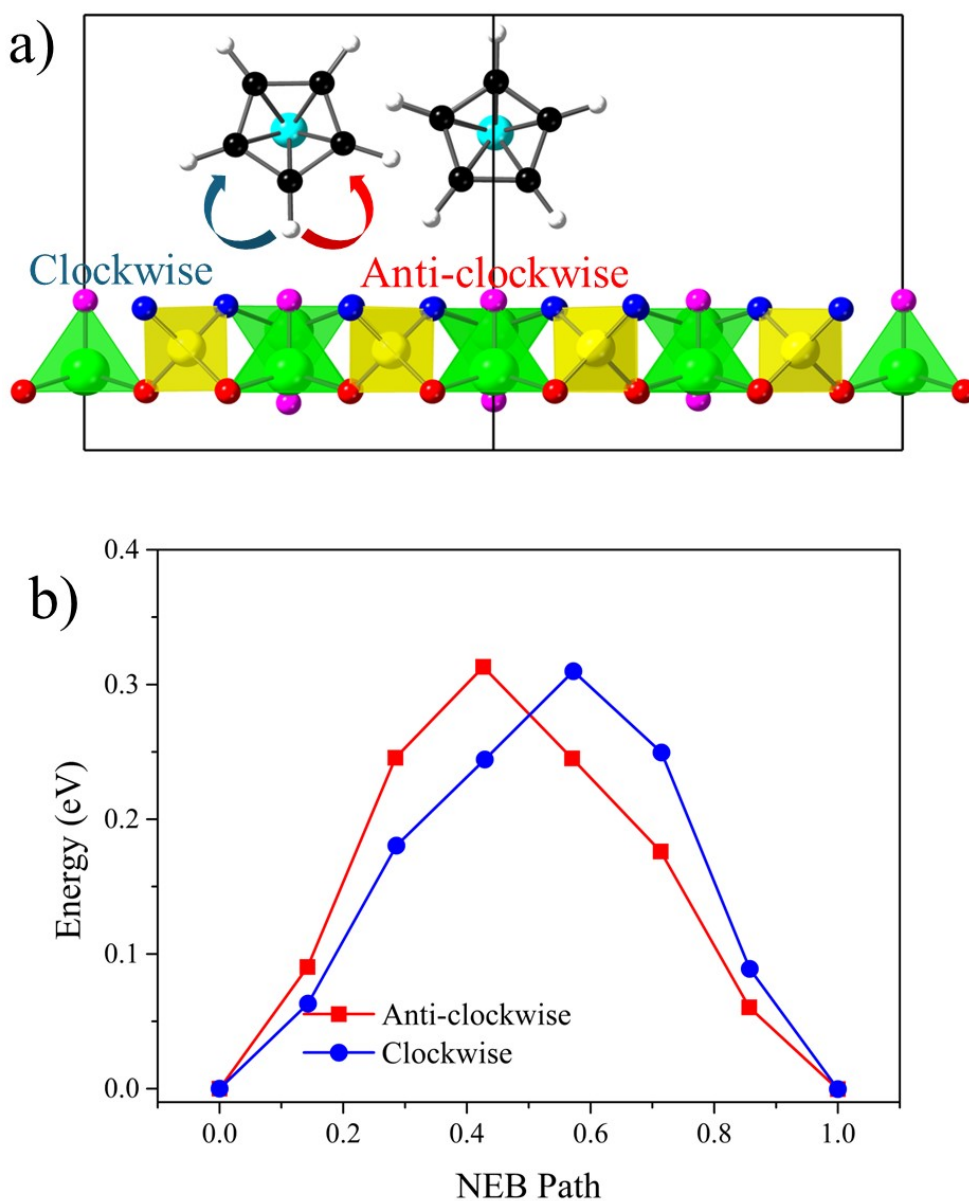

**Figure S5.** a) The E-V-45° to E-V-45° path along the [110] direction. The blue curved arrow means the ferrocene is rolling clockwise during diffusion, while red curved arrow means anti-clockwise; b) The NEB energy profile of ferrocene rolling on E-V-45° to E-V-45°.



## Sliding + Rolling: $V \rightarrow V[110]$ .

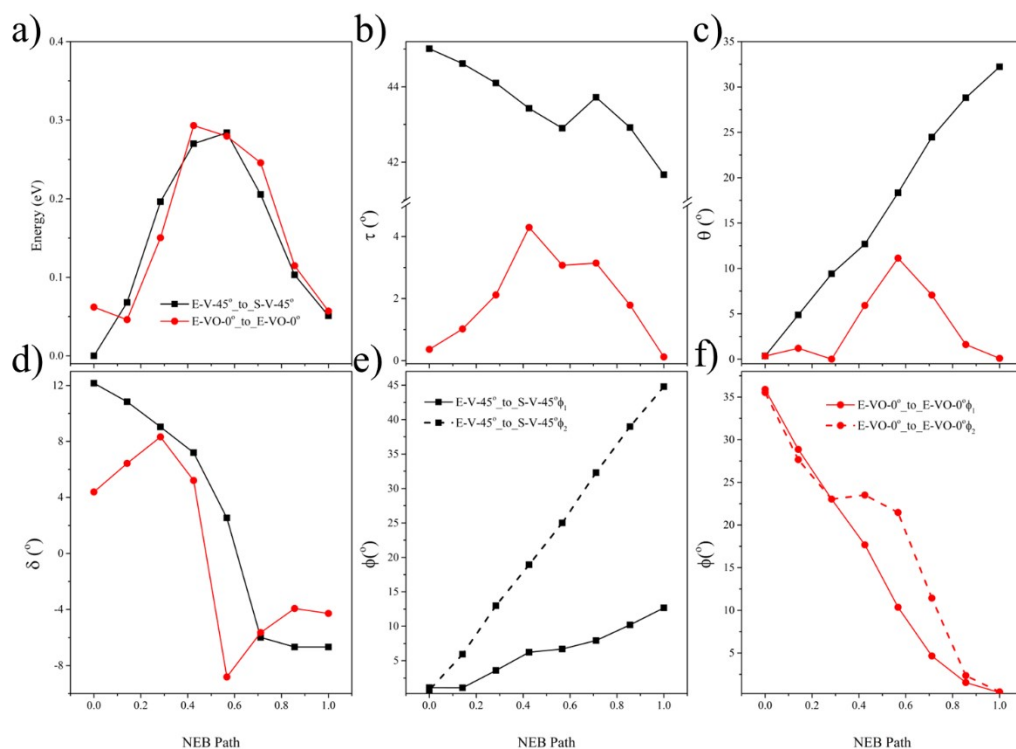

**Figure S6.** (a) NEB energy profiles for pathways E-V-45° to S-V-45° (black) and E-VO-0° to E-VO-0° (red); (b) rotational angle variations of ferrocene; (c) changes in the angle between -CH bonds in the cyclopentadienyl rings; (d) dihedral angle adjustments between the cyclopentadienyl rings; (e) orientation of -CH bonds relative to the [001] direction for the E-V-45° to S-V-45° path; and (f) orientation of -CH bonds relative to the [001] direction for the E-VO-0° to E-VO-0° path.

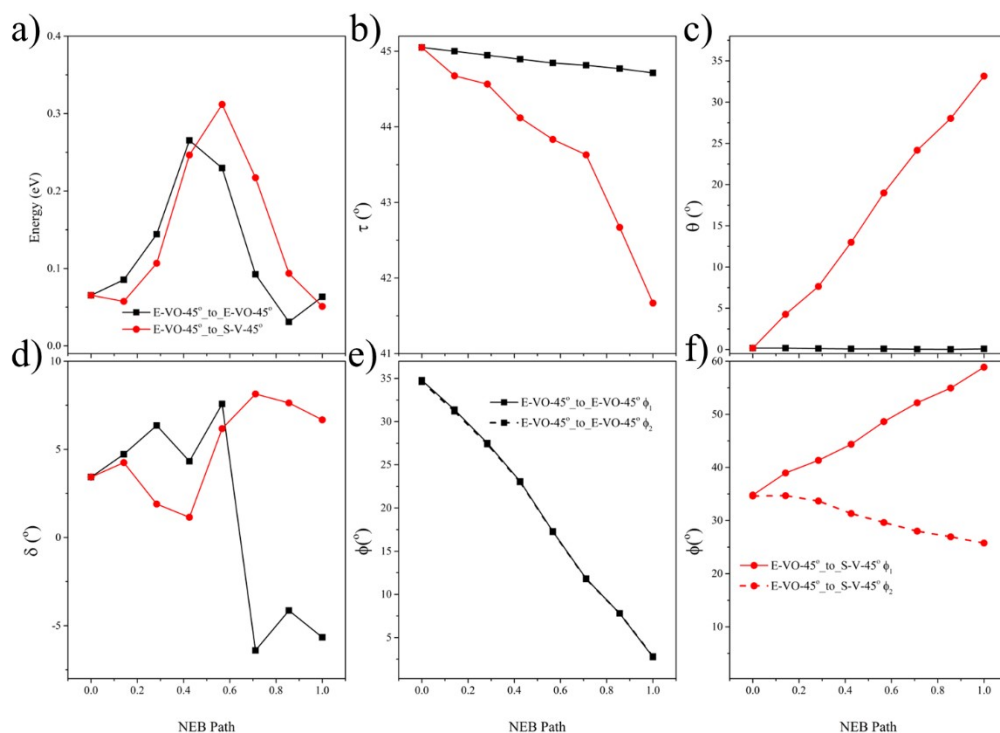

**Figure S7.** (a) NEB energy profiles for pathways E-VO-45° to E-VO-45° (black) and E-VO-45° to S-V-45° (red); (b) rotational angle variations of ferrocene; (c) changes in the angle between -CH bonds in the cyclopentadienyl rings; (d) dihedral angle adjustments between the cyclopentadienyl rings; (e) orientation of -CH bonds relative to the [001] direction for the E-VO-45° to E-VO-45° path; and (f) orientation of -CH bonds relative to the [001] direction for the E-VO-45° to S-V-45° path.

Denser Images of Dihedral Angle for E-V-45° to E-V-45°.

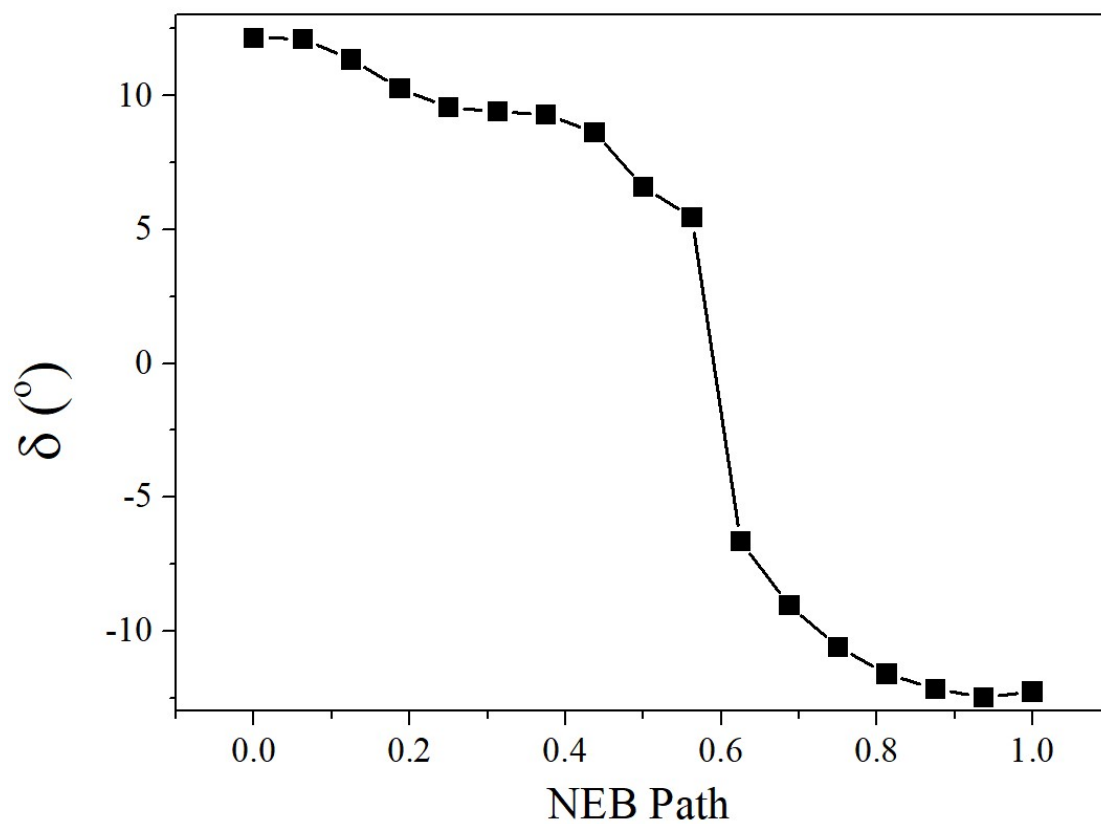

**Figure S8.** Dihedral angle measurements between the cyclopentadienyl rings of E-V-45° to E-V-45° path with more images.

## Sliding + Rotation + Rolling: $V \rightarrow V[110]$ .

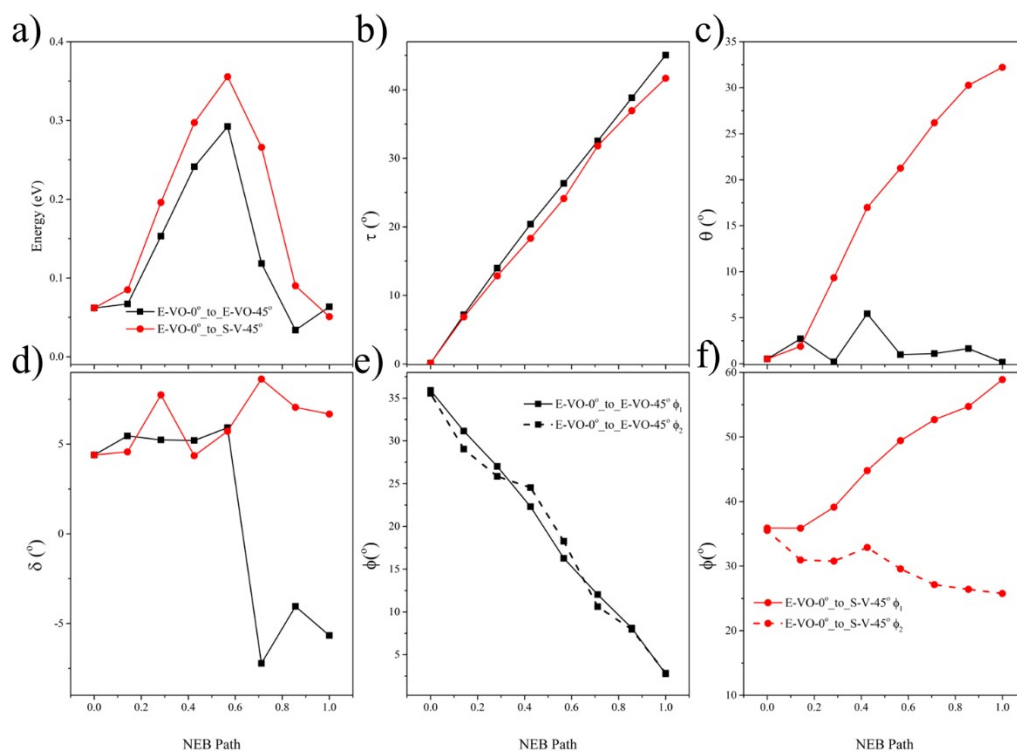

**Figure S9.** (a) NEB energy profiles for pathways E-VO-0° to E-VO-45° (black) and E-VO-0° to S-V-45° (red); (b) rotational angle variations of ferrocene; (c) changes in the angle between -CH bonds in the cyclopentadienyl rings; (d) dihedral angle adjustments between the cyclopentadienyl rings; (e) orientation of -CH bonds relative to the [001] direction for the E-VO-0° to E-VO-45° path; and (f) orientation of -CH bonds relative to the [001] direction for the E-VO-0° to S-V-45° path.

## Sliding Only: P→P [110]

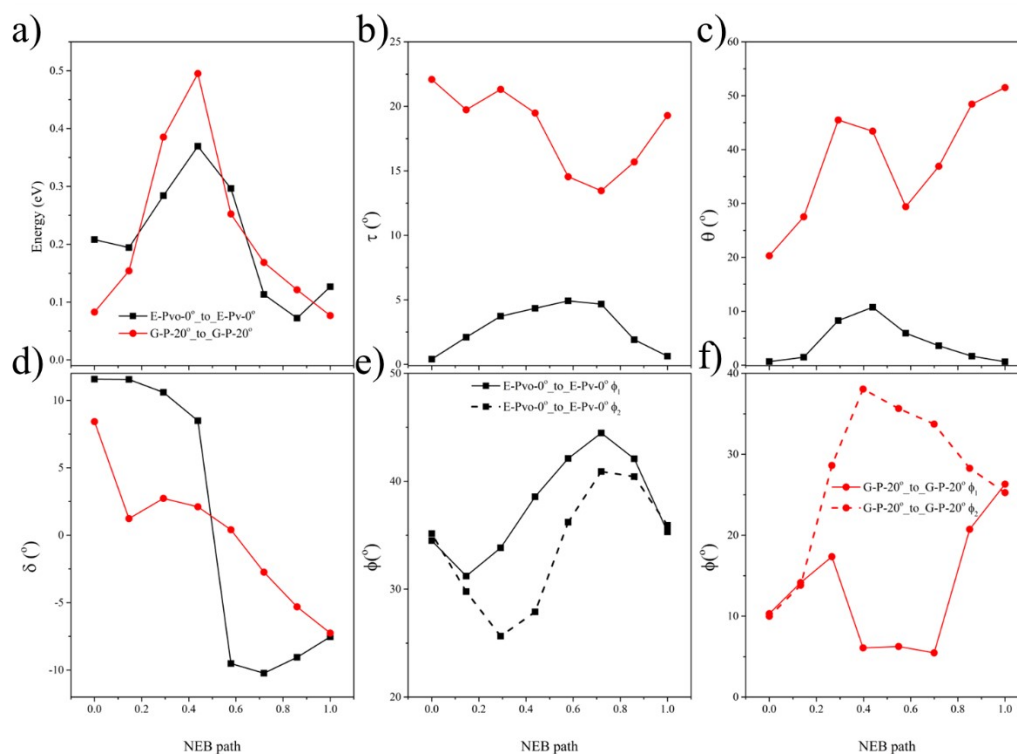

**Figure S10.** (a) NEB energy profiles for pathways E-Pvo-0° to E-Pv-0° (black) and G-P-20° to G-P-20° (red); (b) rotational angle variations of ferrocene; (c) changes in the angle between -CH bonds in the cyclopentadienyl rings; (d) dihedral angle adjustments between the cyclopentadienyl rings; (e) orientation of -CH bonds relative to the [001] direction for the E-Pvo-0° to E-Pv-0° path; and (f) orientation of -CH bonds relative to the [001] direction for the G-P-20° to G-P-20° path.

# Sliding + Rolling: P $\rightarrow$ P[110].

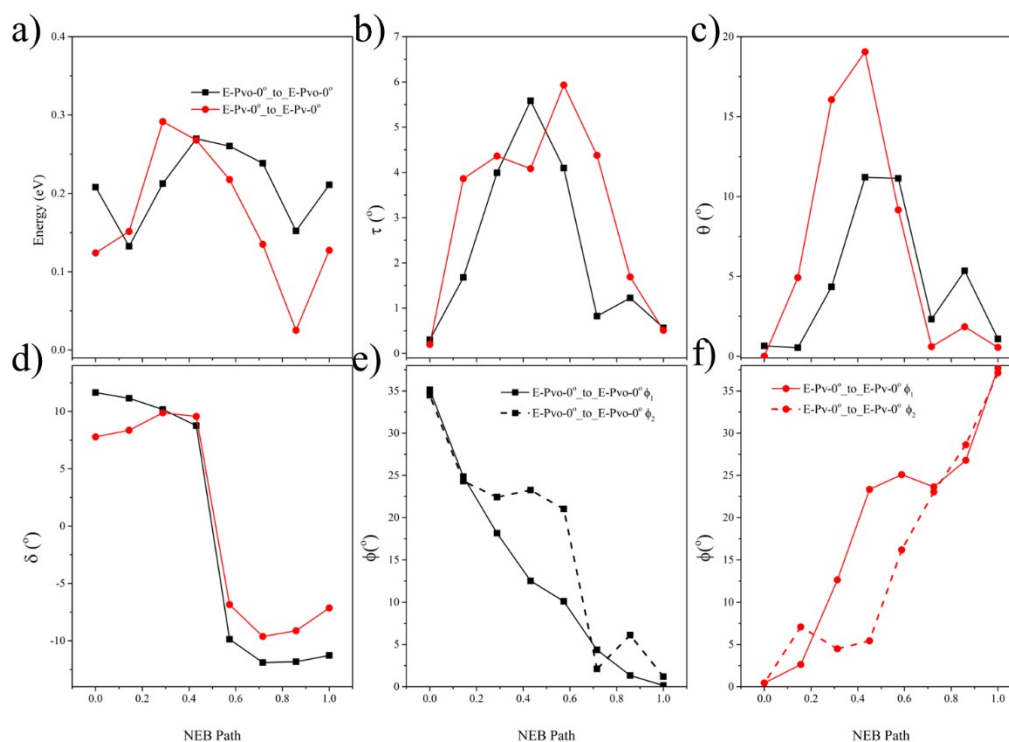

**Figure S11.** (a) NEB energy profiles for pathways E-Pvo-0° to E-Pvo-0° (black) and E-Pv-0° to E-Pv-0° (red); (b) rotational angle variations of ferrocene; (c) changes in the angle between -CH bonds in the cyclopentadienyl rings; (d) dihedral angle adjustments between the cyclopentadienyl rings; (e) orientation of -CH bonds relative to the [001] direction for the E-Pvo-0° to E-Pvo-0° path; and (f) orientation of -CH bonds relative to the [001] direction for the E-Pv-0° to E-Pv-0° path.

## Sliding + Rotation + Rolling: $P \rightarrow P[110]$ .

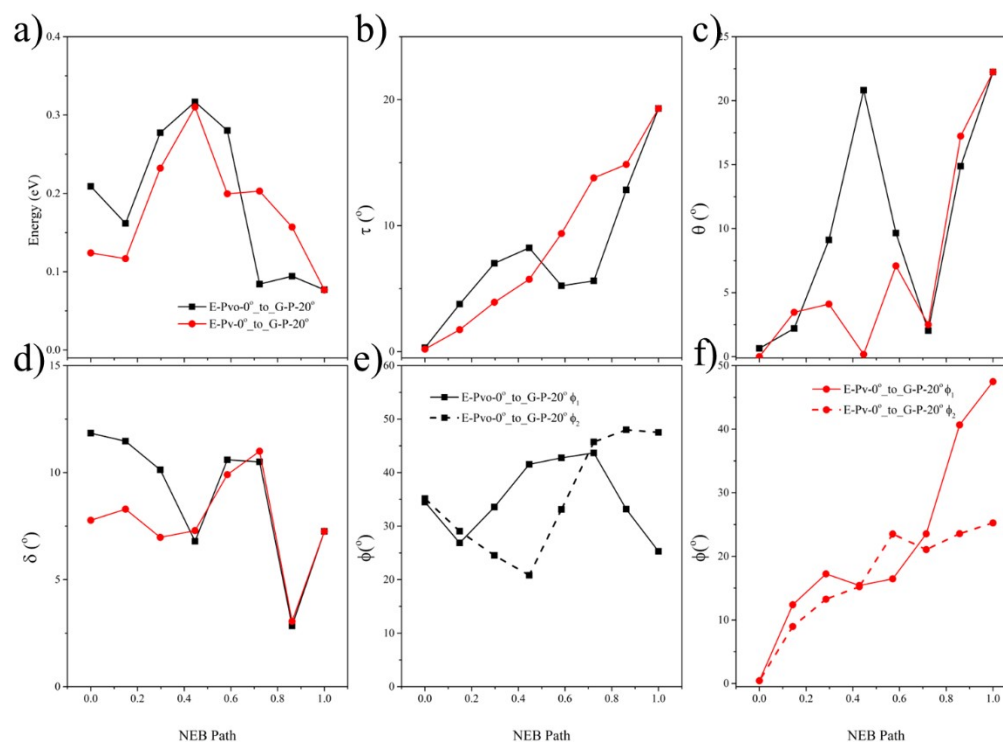

**Figure S12.** (a) NEB energy profiles for pathways E-Pvo-0° to G-P-20° (black) and E-Pv-0° to G-P-20° (red); (b) rotational angle variations of ferrocene; (c) changes in the angle between -CH bonds in the cyclopentadienyl rings; (d) dihedral angle adjustments between the cyclopentadienyl rings; (e) orientation of -CH bonds relative to the [001] direction for the E-Pvo-0° to G-P-20° path; and (f) orientation of -CH bonds relative to the [001] direction for the E-Pv-0° to G-P-20° path.

## Sliding Only: $V \rightarrow P[100]$ .

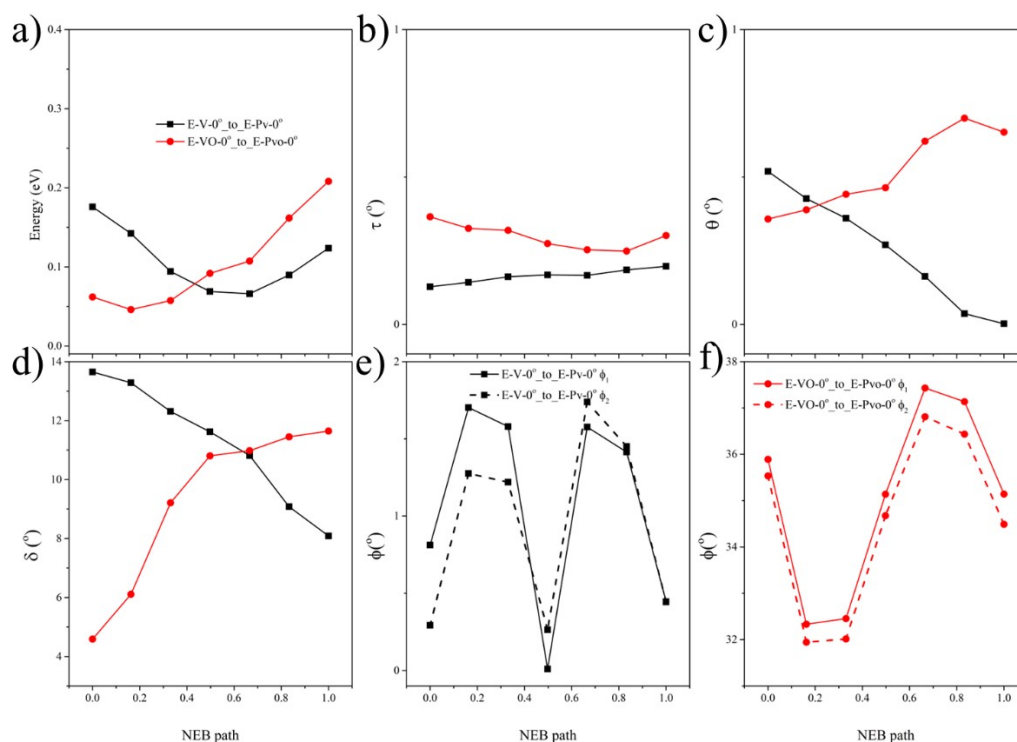

**Figure S13.** (a) NEB energy profiles for pathways E-V-0° to E-Pv-0° (black) and E-VO-0° to E-Pvo-0° (red); (b) rotational angle variations of ferrocene; (c) changes in the angle between -CH bonds in the cyclopentadienyl rings; (d) dihedral angle adjustments between the cyclopentadienyl rings; (e) orientation of -CH bonds relative to the [001] direction for the E-V-0° to E-Pv-0° path; and (f) orientation of -CH bonds relative to the [001] direction for the E-VO-0° to E-Pvo-0° path.



## Sliding + Rotation: $V \rightarrow P[100]$ .

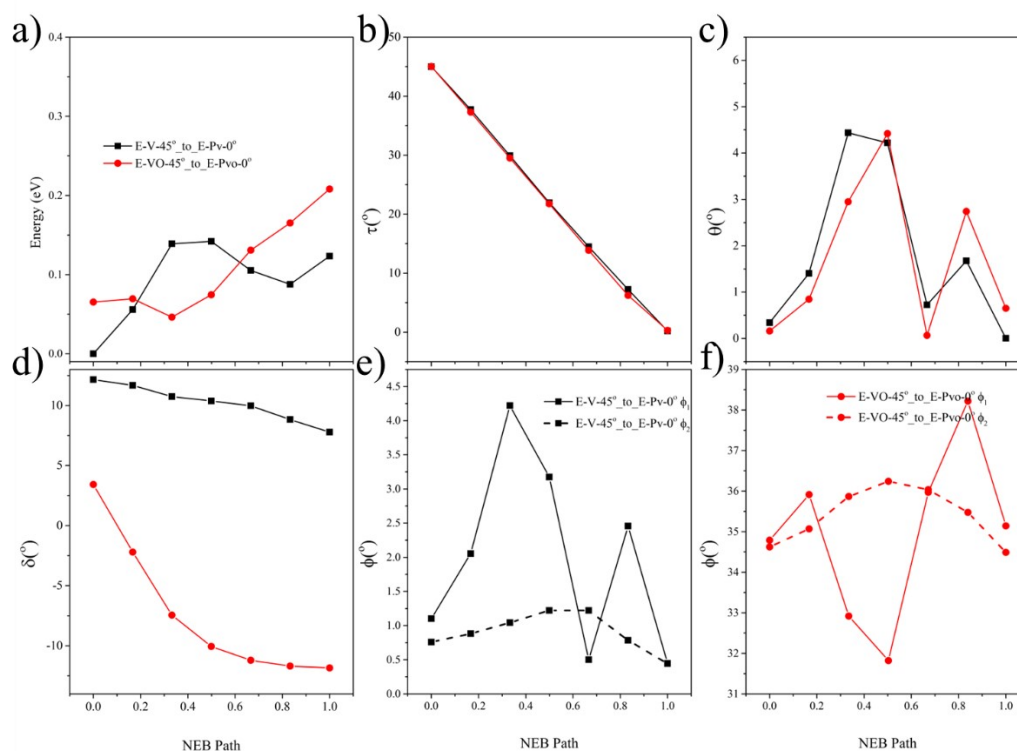

**Figure S14.** (a) NEB energy profiles for pathways E-V-45° to E-Pv-0° (black) and E-VO-45° to E-Pvo-0° (red); (b) rotational angle variations of ferrocene; (c) changes in the angle between -CH bonds in the cyclopentadienyl rings; (d) dihedral angle adjustments between the cyclopentadienyl rings; (e) orientation of -CH bonds relative to the [001] direction for the E-V-45° to E-Pv-0° path; and (f) orientation of -CH bonds relative to the [001] direction for the E-VO-45° to E-Pvo-0° path.

# Sliding + Rolling: $V \rightarrow P[100]$ .

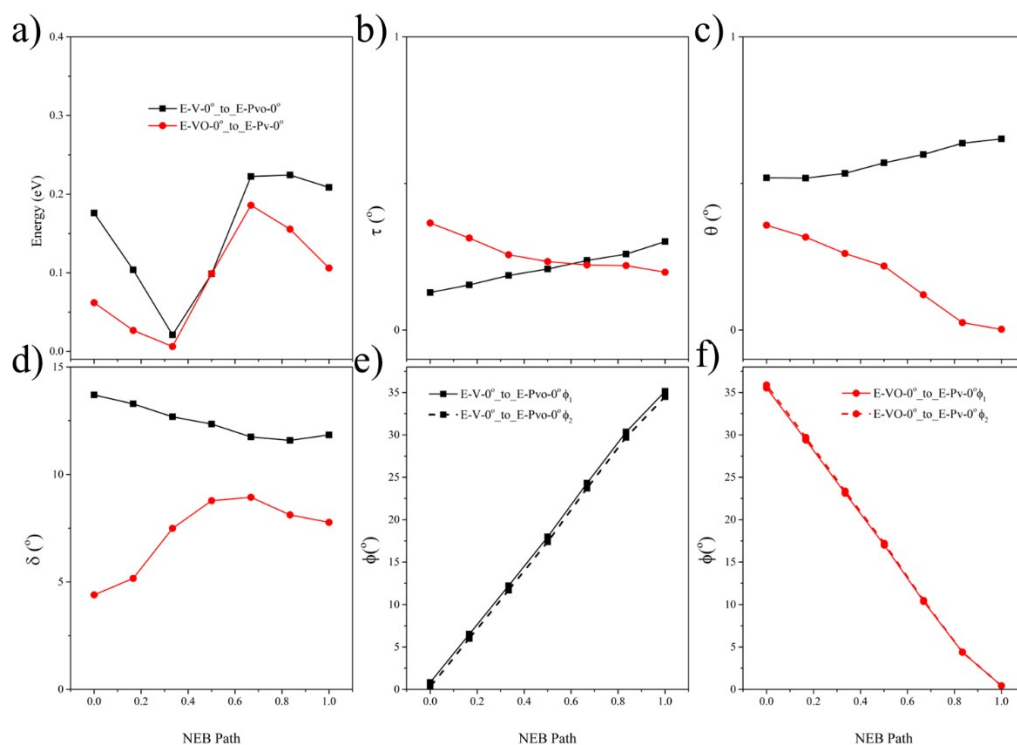

**Figure S15.** (a) NEB energy profiles for pathways E-V-0° to E-Pvo-0° (black) and E-VO-0° to E-Pv-0° (red); (b) rotational angle variations of ferrocene; (c) changes in the angle between -CH bonds in the cyclopentadienyl rings; (d) dihedral angle adjustments between the cyclopentadienyl rings; (e) orientation of -CH bonds relative to the [001] direction for the E-V-0° to E-Pvo-0° path; and (f) orientation of -CH bonds relative to the [001] direction for the E-VO-0° to E-Pv-0° path.

## Sliding + Rolling + Rotation: $V \rightarrow P[110]$ .

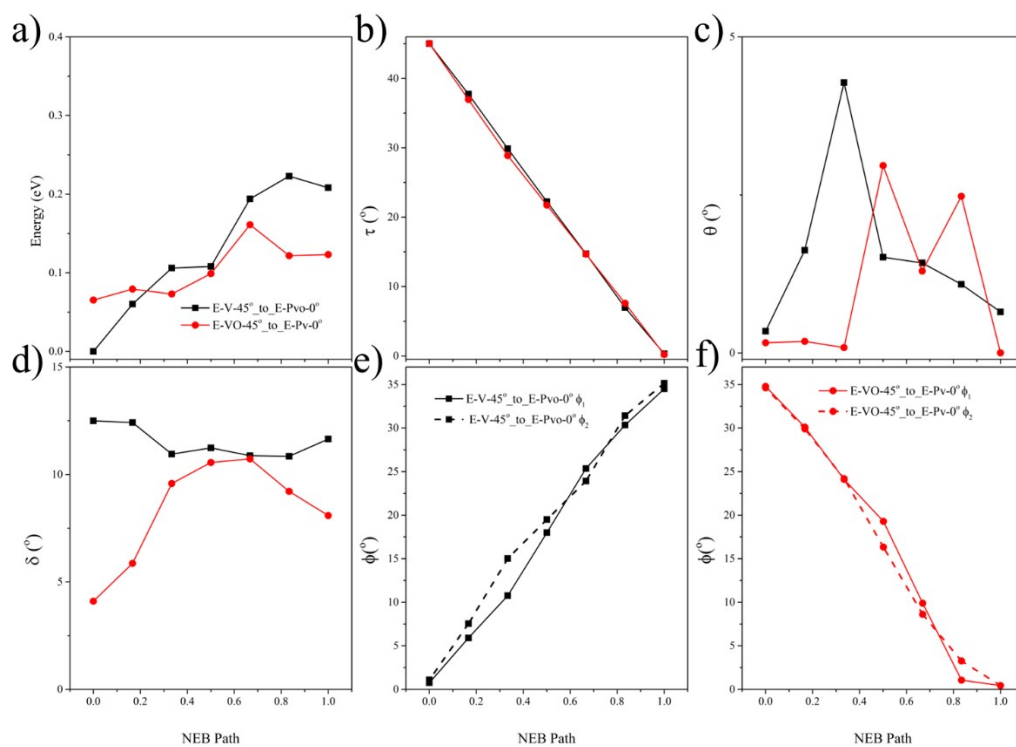

**Figure S16.** (a) NEB energy profiles for pathways E-V-45° to E-Pv-0° (black) and E-VO-45° to E-Pv-0° (red); (b) rotational angle variations of ferrocene; (c) changes in the angle between -CH bonds in the cyclopentadienyl rings; (d) dihedral angle adjustments between the cyclopentadienyl rings; (e) orientation of -CH bonds relative to the [001] direction for the E-V-45° to E-Pv-0° path; and (f) orientation of -CH bonds relative to the [001] direction for the E-VO-45° to E-Pv-0° path.

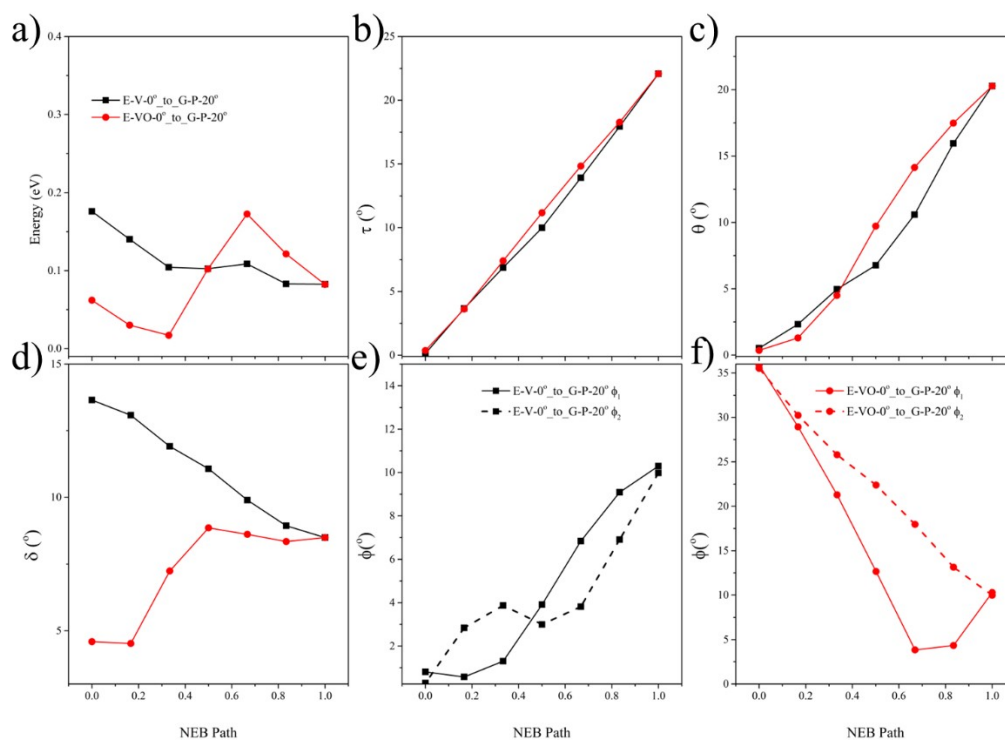

**Figure S17.** (a) NEB energy profiles for pathways E-V-0° to G-P-20° (black) and E-VO-0° to G-P-20° (red); (b) rotational angle variations of ferrocene; (c) changes in the angle between -CH bonds in the cyclopentadienyl rings; (d) dihedral angle adjustments between the cyclopentadienyl rings; (e) orientation of -CH bonds relative to the [001] direction for the E-V-0° to G-P-20° path; and (f) orientation of -CH bonds relative to the [001] direction for the E-VO-0° to G-P-20° path.

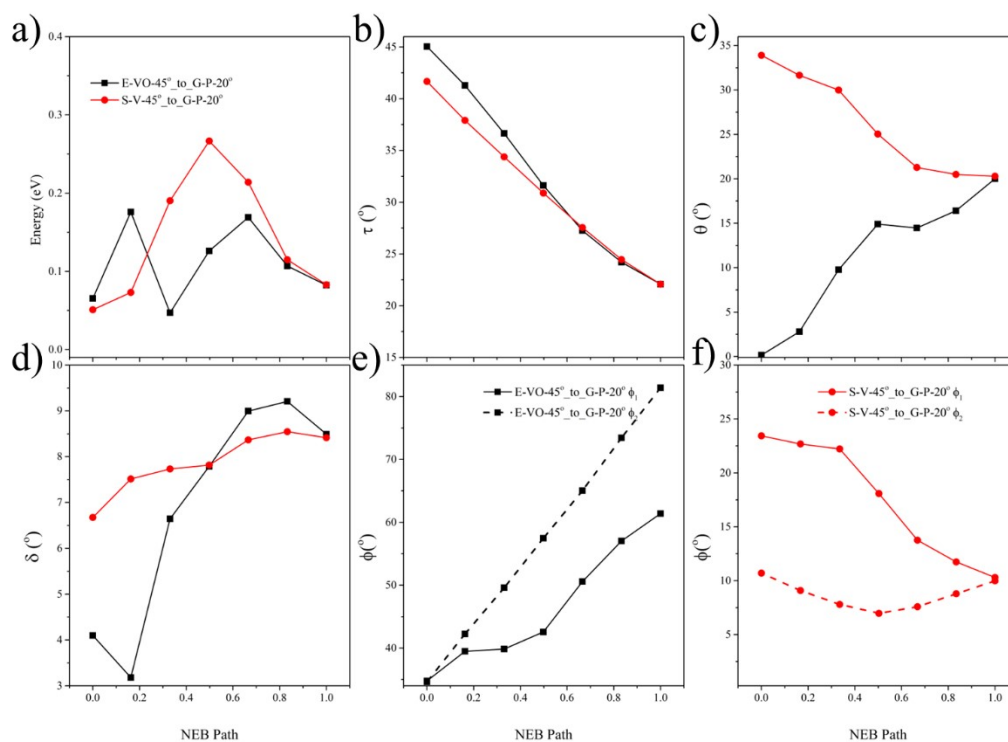

**Figure S18.** (a) NEB energy profiles for pathways E-VO-45° to G-P-20° (black) and S-V-45° to G-P-20° (red); (b) rotational angle variations of ferrocene; (c) changes in the angle between -CH bonds in the cyclopentadienyl rings; (d) dihedral angle adjustments between the cyclopentadienyl rings; (e) orientation of -CH bonds relative to the [001] direction for the E-VO-45° to G-P-20° path; and (f) orientation of -CH bonds relative to the [001] direction for the S-V-45° to G-P-20° path.

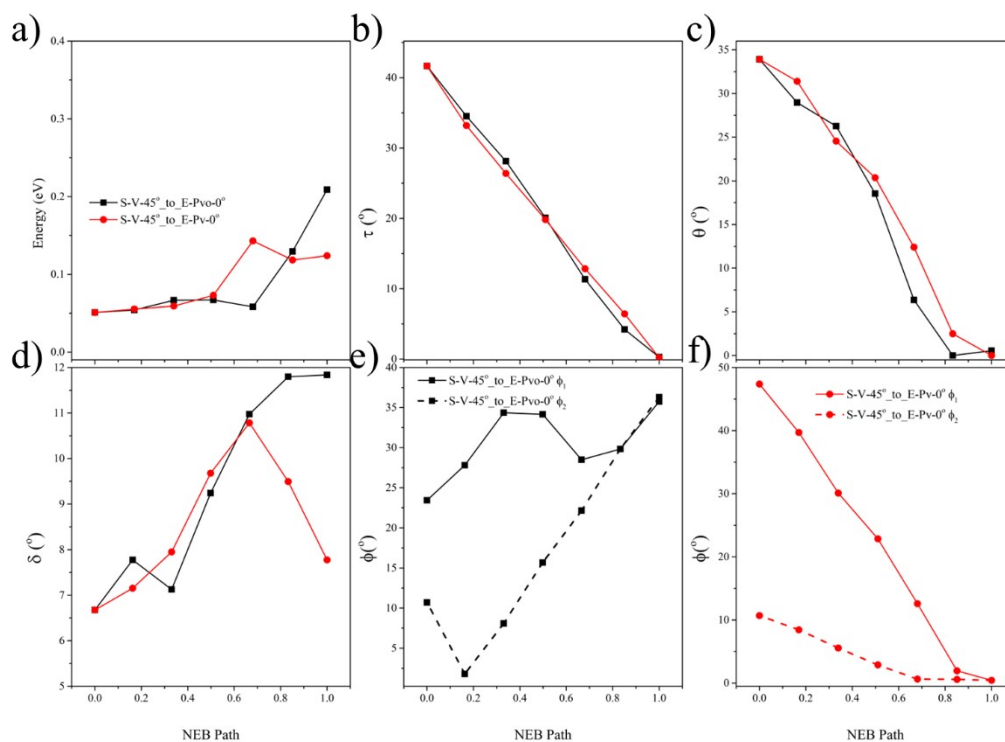

**Figure S19.** (a) NEB energy profiles for pathways S-V-45° to E-Pvo-0° (black) and S-V-45° to E-Pv-0° (red); (b) rotational angle variations of ferrocene; (c) changes in the angle between -CH bonds in the cyclopentadienyl rings; (d) dihedral angle adjustments between the cyclopentadienyl rings; (e) orientation of -CH bonds relative to the [001] direction for the S-V-45° to E-Pvo-0° path; and (f) orientation of -CH bonds relative to the [001] direction for the S-V-45° to E-Pv-0° path.
